# Supplementary material for: Engineering a 3D-Bioprinted Model of Human Heart Valve Disease Using Nanoindentation-Based Biomechanics
Source: MDPI journal article supplement (doi:10.3390/nano8050296), 2018-05-03
Supplement: s1 [file s1]

## Supplementary Materials

**Table S1.** Compressive Young's modulus (E), Storage modulus (G'), Loss modulus (G''), Complex modulus (G\*), and tan  $\delta$  of all valve layer samples.

| Layer         | E (kPa) |              | G' (kPa) |            | G'' (kPa) |            | G* (kPa) |            | tan $\delta$ |           |
|---------------|---------|--------------|----------|------------|-----------|------------|----------|------------|--------------|-----------|
|               | Median  | Range        | Median   | Range      | Median    | Range      | Median   | Range      | Median       | Range     |
| Whole Valve   | 26.7    | 22.2-43.2    | 8.2      | 7.1-12.6   | 3.0       | 2.2-6.7    | 8.9      | 7.8-14.8   | 0.35         | 0.29-0.48 |
| Fibrosa       | 37.1    | 20.3-56.7    | 11.2     | 5.4-18.0   | 4.4       | 2.8-6.3    | 12.4     | 6.8-18.9   | 0.42         | 0.25-0.75 |
| Spongiosa     | 15.4    | 12.8-26.8    | 4.7      | 3.9-8.5    | 2.0       | 1.9-2.9    | 5.1      | 4.3-8.9    | 0.43         | 0.33-0.49 |
| Ventricularis | 26.9    | 16.6-33.5    | 8.7      | 5.4-13.2   | 3.4       | 2.0-4.0    | 9.0      | 1.9-11.2   | 0.39         | 0.38-0.73 |
| Calcification | 670.1   | 259.5-1080.7 | 212      | 78.6-345.3 | 69.2      | 36.2-102.1 | 223.4    | 86.5-360.2 | 0.32         | 0.29-0.36 |

**Table S2.** Compressive Young's modulus (E), Storage modulus (G'), Loss modulus (G''), Complex modulus (G\*), and tan  $\delta$  of samples with different hydrogel formulations.

| Cross-linking time (s) | GelMA % <sup>1</sup> | E (kPa) |             | G' (kPa) |             | G'' (kPa) |           | G* (kPa) |             | tan $\delta$ |           |
|------------------------|----------------------|---------|-------------|----------|-------------|-----------|-----------|----------|-------------|--------------|-----------|
|                        |                      | Median  | Range       | Median   | Range       | Median    | Range     | Median   | Range       | Median       | Range     |
| 30                     | 5                    | 21.8    | 15.0 - 26.6 | 7.2      | 4.6 - 8.8   | 0.6       | 0.4 - 1.9 | 7.3      | 5.0 - 8.9   | 0.08         | 0.06-0.42 |
| 30                     | 6.67                 | 38.6    | 23.6 - 60.1 | 10.5     | 7.8 - 20.0  | 0.9       | 0.4 - 1.9 | 10.7     | 7.9 - 20.0  | 0.09         | 0.04-0.15 |
| 30                     | 8.33                 | 50.2    | 38.2 - 54.1 | 16.7     | 12.7 - 18.0 | 1.3       | 0.6 - 2.0 | 16.7     | 12.7 - 18.0 | 0.08         | 0.05-0.11 |
| 30                     | 10                   | 49.1    | 28.3 - 76.4 | 15.9     | 9.4 - 25.5  | 1.7       | 0.8 - 4.0 | 16.4     | 9.4 - 25.5  | 0.13         | 0.09-0.24 |
| 90                     | 5                    | 38.5    | 33.3 - 64.9 | 12.8     | 11.1 - 21.6 | 0.9       | 0.8 - 1.0 | 12.8     | 11.1 - 21.6 | 0.06         | 0.05-0.09 |
| 90                     | 6.67                 | 50.4    | 29.3 - 70.2 | 16.8     | 8.9 - 23.3  | 2.3       | 1.3 - 4.4 | 16.8     | 9.8 - 23.4  | 0.12         | 0.08-0.49 |
| 90                     | 8.33                 | 53      | 42.2 - 63.1 | 17.2     | 13.0 - 19.4 | 3.6       | 1.8 - 9.7 | 17.7     | 14.1 - 21.0 | 0.26         | 0.08-0.50 |
| 90                     | 10                   | 53.7    | 34.8 - 77.8 | 16.8     | 9.2 - 25.9  | 3.5       | 1.6 - 7.1 | 17.9     | 11.6 - 25.9 | 0.26         | 0.06-0.78 |

<sup>1</sup>All hydrogels contain 1% HAMA in addition to the stated % of GelMA.

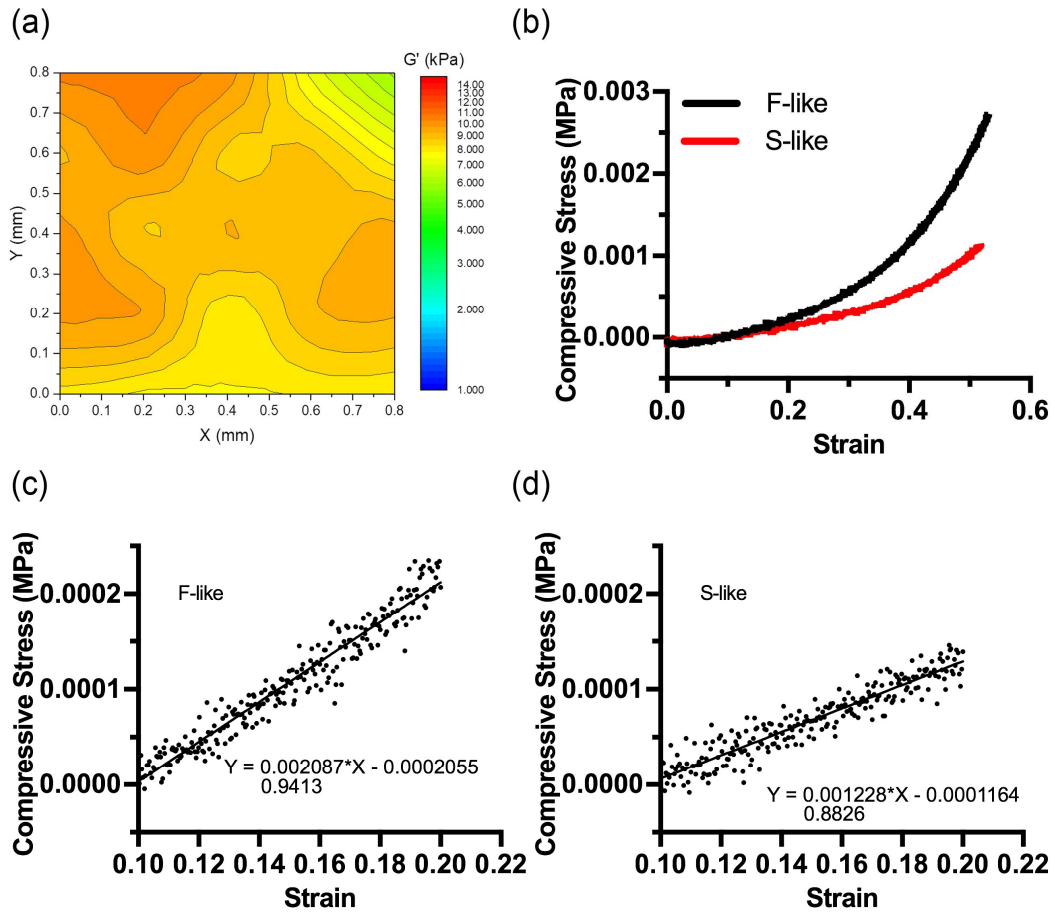

**Figure S1.** Mechanical testing of aortic valve tissue and GelMA/HAMA hydrogels demonstrated the validity of bulk nanoindentation measurements: (a) Heat map of storage moduli ( $G'$ ) generated from 9 nanoindentations performed across the surface of a valve leaflet layer demonstrated uniformity of nanoindentation-measured  $G'$  values, (b–d) Stress/strain curves generated by unconfined compression testing of F-like and S-like hydrogels showed that the modulus of F-like hydrogels was  $\sim 2x$  that of S-like hydrogels, consistent with moduli measured by nanoindentation. Parts c and d are magnification of the linear region of the loading curves in part b. Calculation of moduli by linear regression in these regions found a  $\sim 2x$  increase in loading curve slope between F-like and S-like hydrogels.

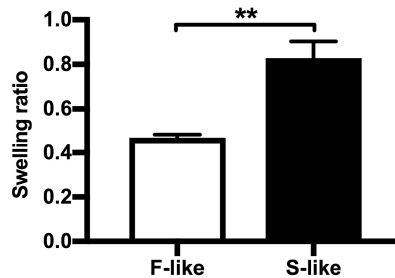

**Figure S2.** 24-hour hydrogel swelling ratios: There was a significant increase in the swelling ratio of acellular S-like hydrogels vs. those of F-like hydrogels after 24 hours in PBS at room temperature. Swelling ratio =  $(\text{weight}_{24\text{hr}} - \text{weight}_{0\text{hr}}) / \text{weight}_{24\text{hr}}$ ;  $n = 4$  samples per condition, \*\*  $p < 0.01$ .

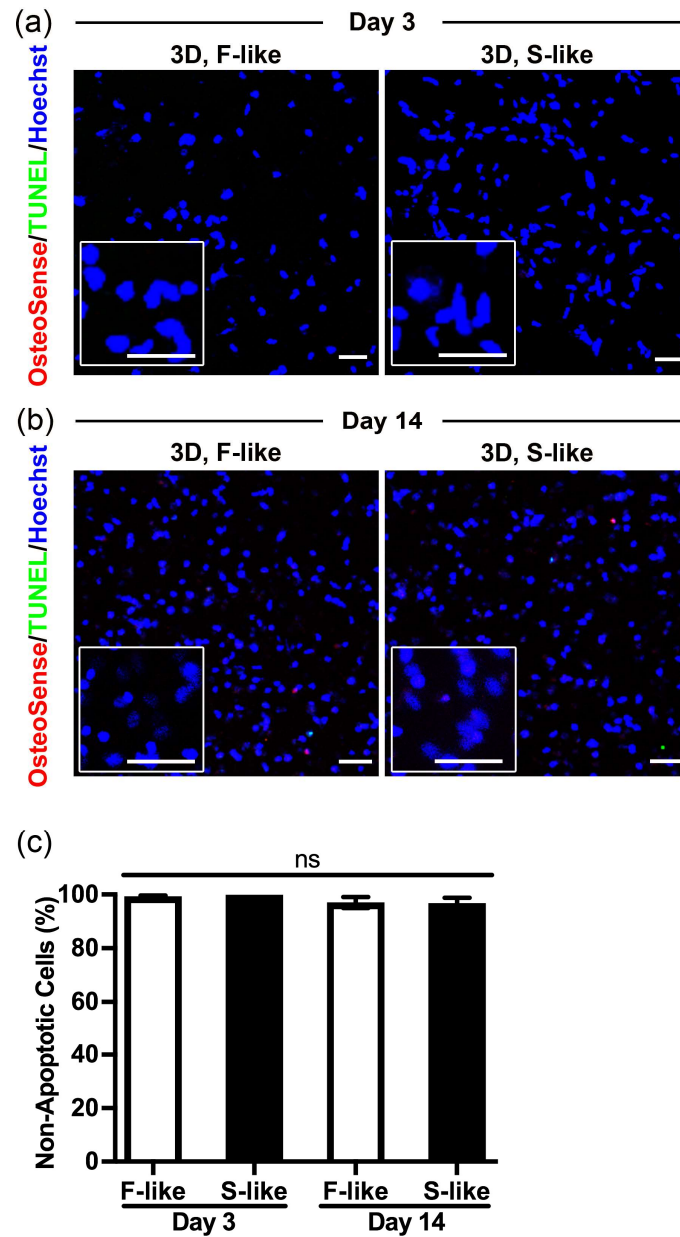

**Figure S3.** Low levels of short- or long-term apoptotic cell death in 3D-bioprinted hydrogels, green = TUNEL apoptosis assay, blue = Hoechst nuclear stain: (a–c) VICs isolated from non-diseased human AV and cultured in NM showed negligible levels of apoptosis at 3 (a) or 14 (b) days after bioprinting. There were no significant differences in apoptosis between F-like or S-like hydrogels, nor between the day 3 and day 14 time points. n = 3 samples per condition (3 images per sample); scale bar = 50  $\mu$ m. **Note:** Part b and associated quantification data is duplicated from Figure 5a, to enable direct comparison here.

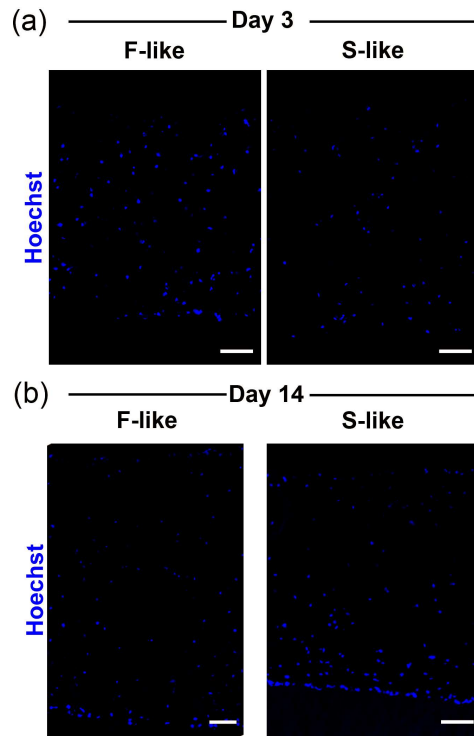

**Figure S4.** Uniformity of encapsulated VIC distributions in 3D-bioprinted hydrogels, blue = Hoechst nuclear stain: (a/b) Representative cross-sectional images of cell distribution in F-like and S-like hydrogels after 3 (a) and 14 (b) days in NM culture demonstrated evenly distributed initial VIC seeding was maintained over long-term culture of hydrogels; scale bar = 100  $\mu\text{m}$ .

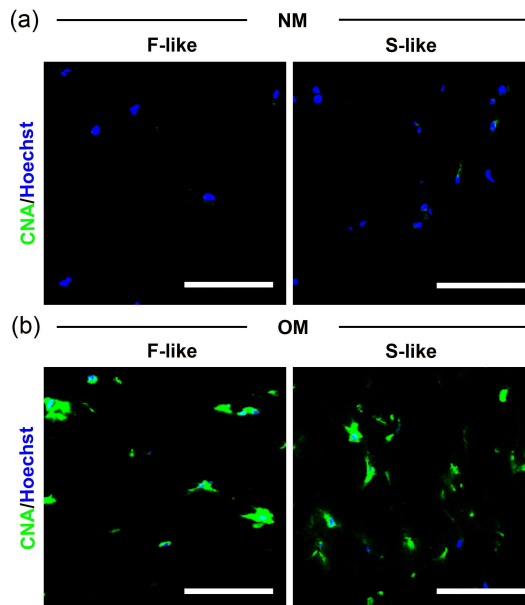

**Figure S5.** OM stimulation induced marked VIC collagen secretion after 28 days in hydrogel culture: (a,b) VICs isolated from non-diseased human AV and exposed to OM (and not NM) for 28 days stimulated substantial production of collagen, as shown by representative images of collagen-binding probe (CNA35) fluorescence (green); scale bar = 100  $\mu\text{m}$ .
